# Supplementary material for: Elevated CO2 alleviates high PAR and UV stress in the unicellular chlorophyte Dunaliella tertiolecta
Source: Royal Society of Chemistry journal article supplement (doi:10.1039/c4pp00044g), 2014-06-23
Supplement: c4pp00044g3.pdf [file c4pp00044g3.pdf]

**Table-1S.** Measured pH values and partial pressure of CO<sub>2</sub> (pCO<sub>2</sub>, ppmv) of *Dunaliella tertiolecta* cultures under the different PAR+UVR and CO<sub>2</sub> treatments. LC: low CO<sub>2</sub> (390 ppmv in the air bubbling system); HC: high CO<sub>2</sub> (1000 ppmv in the air bubbling system). Data are means of two independent cylinders ± standard deviation). See text for details.

|                        | pH          |             | pCO <sub>2</sub> |          |
|------------------------|-------------|-------------|------------------|----------|
|                        | LC          | HC          | LC               | HC       |
| <b>T<sub>ini</sub></b> | 8.11 ± 0.00 | 7.70 ± 0.00 | 325 ± 7          | 956 ± 17 |
| <b>I1100</b>           | 8.02 ± 0.13 | 7.83 ± 0.01 | 432 ± 146        | 687 ± 13 |
| <b>I800</b>            | 8.33 ± 0.00 | 7.92 ± 0.04 | 175 ± 7          | 551 ± 61 |
| <b>I400</b>            | 8.39 ± 0.04 | 8.12 ± 0.05 | 146 ± 6          | 318 ± 44 |
| <b>I200</b>            | 8.30 ± 0.01 | 8.10 ± 0.06 | 189 ± 4          | 337 ± 59 |
